# Supplementary material for: Blooming of a microbial community in an Ediacaran extreme volcanic lake system
Source: Springer Nature journal article supplement (doi:10.1038/s41598-023-36031-5), 2023-06-05
Supplement: MOESM1 [file 41598_2023_36031_MOESM1_ESM.pdf]

1 Supplementary information for:

2 **Blooming of a microbial community in an Ediacaran extreme volcanic lake**  
3 **system**

4 Ibtissam Chraiki<sup>1</sup>, Ernest Chi Fru<sup>2</sup>, Andrea Somogyi<sup>3</sup>, El Hafid Bouougri<sup>1</sup>, Olabode Bankole<sup>4</sup>,  
5 Mohamed Ghnahalla<sup>4</sup>, Abderrazak El Albani<sup>4\*</sup>

6 <sup>1</sup>Department of Geology, Faculty of Sciences-Semlalia, Cadi Ayyad University, Marrakesh, Morocco

7 <sup>2</sup>Centre for Geobiology and Geochemistry, College of Physical and Engineering Sciences, School of Earth and  
8 Environmental Sciences, Cardiff University, Cardiff, UK

9 <sup>3</sup>Synchrotron Soleil, Saint-Aubin, France

10 <sup>4</sup>CNRS IC2MP UMR 7285, University of Poitiers, Poitiers, France

11

12 **Supplemental file contents:**

13 **Supplementary text**

14 **Supplementary Figures 1 to 9**

15 **Supplementary Tables 1 to 9**

16 **Supplementary captions**

17 **Supplementary References**

18

## 19 **Supplementary Note 1: Trace element systematics**

20 For the 54 trace elements measured, high concentrations were recorded for As, Ba, Cr, Cu, Pb,  
21 Sb, U, V, and Zr. Arsenic content decreased upward in the section with a general variation from  
22 108–277 ppm, averaging 189 ppm in the carbonates, 22.7–77.2 ppm with an average of 49.62  
23 ppm in the epiclastic deposits (Supplementary Table 2). Average As concentrations in the  
24 carbonates are ~3.81 times over those measured in the overlying epiclastic facies and ~126.16  
25 times in excess of upper continental crust (UCC) concentrations<sup>1</sup>. Ba is the most abundant trace  
26 element in all samples, averaging 100.89 ppm and 522.1 ppm in the carbonates and the  
27 epiclastic deposits, respectively (Supplementary Table 2). Overall, the samples are enriched in  
28 Pb compared to the UCC, with an average of 3.92 ppm and 10.12 ppm in the carbonates and  
29 epiclastic samples and exceeding the UCC concentration by 3.92 and 10.12 times, respectively.  
30 Average carbonate Cu concentrations of 38.34 ppm exceed UCC composition by 1.5 times,  
31 whereas an average of 11.82 ppm in the epiclastic deposit show deficiency compared to the  
32 UCC (a mean of 25 ppm). The carbonate Sb values show a slightly varying pattern relative to  
33 the epiclastic deposit. They exhibit a mean of 4.4 ppm in the carbonates, which tended to  
34 fluctuate from 0.42–8.23 ppm, being 22 times above UCC content. The average of 7.74 ppm,  
35 spread between 2.69–14 ppm in the epiclastic material, showed 38.69 times excess of UCC  
36 concentrations. U composition expresses values 2.71 and 3.9 times above the geochemical  
37 background of the UCC<sup>1</sup> in carbonates and epiclastic samples, respectively. On average, V was  
38 shown to have elevated concentrations up to 14.38 and 39.92 times over UCC concentrations  
39 for the carbonates and the epiclastic samples, respectively. Mo remained below the detection  
40 limit of 0.5 ppm in most of the carbonates and epiclastic samples, except AT2, AT3-C, AT12-  
41 S, and AT27, which had values ranging from 0.63–15.1 ppm (Supplementary Table 2).

## 42 **Supplementary Note 2: Rare earth elements (REE) and Yttrium (Y) systematics**

43 The carbonate microbialites show general REY patterns characterized by depletion in light rare  
44 earth elements (LREE), enrichment of middle rare earth elements (MREE), and a variation from  
45 relatively flat to being slightly depleted in heavy rare earth elements (HREE) (Figure 1a).  
46 Relative to PAAS, the epiclastic samples display slight light LREE depletion and MREE  
47 enrichment, while a slight enrichment in HREE was detected for two samples (Figure 1b). The  
48 others showed flat to relatively depleted patterns (Figure 1b). A slight enrichment in light rare  
49 earth elements (LREE) compared to (HREE) was observed in AT3-C, AT5-V, AT12-S, AT48,  
50 AT46, and AT47 with Pr<sub>N</sub>/Yb<sub>N</sub>= 1.11, 1.26, 1.16, 1.23, 1.72, and 1.28, respectively  
51 (Supplementary Figure 5, Supplementary Table 3).

## 52 **Supplementary Note 3: Geological setting**

53 The Moroccan Anti-Atlas is an ENE–WSW oriented belt bounded northward by the Variscan  
54 South-Atlas strike-slip Fault (SAF), and forms the foreland of the Variscan belt which expose  
55 a Proterozoic basement and an Upper Ediacaran-Paleozoic slightly folded cover<sup>2–4</sup>  
56 (Supplementary Figure 8a). In the Anti-Atlas inliers, the ca. 2 Ga Eburnean Paleoproterozoic  
57 to ca. 890–580 Ma Pan-African-Cadomian Neoproterozoic basement is unconformably overlain  
58 by the ca. 577–547 Ma Upper Ediacaran Ouarzazate Group, which forms a thick and regionally  
59 extensive volcano-sedimentary wedge associated with intrusive plutonic suites<sup>5–9</sup>. In the  
60 Saghro massif (Supplementary Figure 8a), the Upper Ediacaran volcanic and volcanoclastic  
61 Ouarzazate Group and their coeval subvolcanic intrusive rocks are subdivided into the lower

62 Mançour Group and the upper Imlas Group (labeled respectively as XIII<sub>m</sub> and XIII<sub>s</sub> in the  
63 geological map of Tiwit<sup>10</sup>. They are separated by an angular unconformity related to the tilting  
64 of block fault, and are crosscut by the plutonic Tanghourt suite<sup>9,11-13</sup>.

65 Most of the volcanic rocks are peraluminous to metaluminous and range from basalt, andesite  
66 to rhyolite, with high-K calc-alkaline to shoshonitic affinities<sup>9</sup>. Their structural, sedimentary,  
67 and volcanic features indicate a wide caldera containing several subaerial volcanic centers with  
68 effusive activity and subaerial clastic sedimentation. The main known Caldera complexes in  
69 the central and eastern Anti-Atlas are Achkoukchi in Sirwa, Oued Dar'a, and Qal'at Mgouna in  
70 Jbel Saghro<sup>8,9,13</sup>. In the southeast part of the Saghro massif ([Supplementary Figure 8a-b](#)), the  
71 Oued Dar'a caldera forms in a pull-apart graben, and consists of a wide rectangular volcanic  
72 structure, bounded by two NE-SW strike-slip faults<sup>14</sup>. This tectonic and volcanic trough is  
73 mainly filled with the volcanic and volcanoclastic rocks of the lower Ouarzazate Group, which  
74 are crosscut by rhyolitic dykes. The dominating facies are ash-flow tuff of dacite and rhyolite  
75 composition.

76 The tuff from the Oued Dar'a caldera yielded a SHRIMP U-Pb zircon age of  $574 \pm 7$  Ma,  
77 which is approximately similar to the age of  $571 \pm 7$  Ma obtained from a tuff in the northern  
78 margin and interpreted as the age of the Oued Dar'a Caldera-fill and as the time of the last  
79 major eruption from this Caldera ([Supplementary Figure 8b](#))<sup>9</sup>. The northeast margin of Oued  
80 Dar'a Caldera is crosscut by pink granite, whereas the southwest margin forms a classical  
81 sequence of caldera collapse margin, dominated by volcanoclastic deposits and in which thin  
82 and minor lacustrine beds are preserved<sup>2,9,15,16</sup>. Among these sparse meter-thick lacustrine  
83 carbonate-bearing layers is the famous succession of Amane Tazgart (Amane-n'Tourhart sensu  
84 Choubert & Faure Muret,<sup>16</sup>), labeled in the 1/50.000 geological map of Tizgui as NP3cs<sup>17</sup>. This  
85 locality crops out along the national road of Ouarzazate-Agdz, ~25 km south of Ouarzazate  
86 city.

87 The Amane Tazgart succession forms a lens-shaped unit, less than 1 km wide and up to ~15 m  
88 thick in the central part. The succession is gently folded, slightly dipping toward the WNW,  
89 and divided by an NNE-SSW fault into two compartments<sup>18</sup>. It is underlain by grey aphanitic  
90 andesite flows and overlain by a volcano-sedimentary succession including andesitic lava  
91 flows, peperites, and epiclastic micro-conglomerate and sandstone rich in volcanic clasts. All  
92 these rocks including the Amane Tazgart are crosscut by doleritic dykes up to 4 m thick. The  
93 surrounding depositional setting dominated by the subaerial volcanic and sedimentary setting  
94 of the Oued Dar'a Caldera, as well as the overall facies features of the Amane Tazgart suggest  
95 a short quiescence episode of volcanism and lacustrine deposits in ephemeral ponds<sup>2,9,15,16,18,19</sup>.

96 The Amane Tazgart succession can be divided broadly into a carbonate dominated lower part  
97 and an epiclastic-dominated upper part ([Figure 10](#)). In both parts, a variety of distinct microbial  
98 deposits and related fabrics, are interbedded with non-microbial deposits<sup>18</sup>. Microbial deposits  
99 show diversity in shapes and fabrics and preserve evidence for primary microbial accretion  
100 structures and early diagenetic processes. The lower part consists mainly of thrombolites, and  
101 composite microbialites usually with irregular to patchy mesoclots, or occasionally arranged as  
102 a dendroidal pattern<sup>18</sup>. The fabrics contain peloidal clots surrounded by primary calcite cement.  
103 Tow beds of flat large domal stromatolites up to 30 cm thick are intercalated within thrombotic  
104 and composite microbialites ([Figure 10](#)). They are characterized by an alternation of tufted  
105 microbial mats, micritic laminae, and microsparitic laminae<sup>18</sup>. The upper part comprises of a

106 meter-thick stromatolite bed, arranged into several growth forms. This bed starts with flat to  
 107 wavy laminated stromatolites that grades to small-scale linked stromatolitic columns. They are  
 108 overlain by decimeter to meter thick domal stromatolites with low convex laminae. The overall  
 109 changes in shape appear controlled by water depth and physical environmental conditions<sup>18</sup>.  
 110 Microbial fabrics in the thrombolites and stromatolites were partially disrupted and vanished  
 111 during diagenesis and hydrothermal fluid seepage. The resulting fabrics record a complex  
 112 diagenetic story. Primary calcite cement geopetally filled the internal porosity, whereas both  
 113 microbial fabrics and cement generations were silicified during the late diagenetic stage<sup>18,19</sup>.  
 114 Previous works on the Amane Tazgart deposits and their equivalents in the Anti-Atlas described  
 115 the general trend of these deposits, facies diversity, and diagenetic processes with various stages  
 116 of cementation and silicification, linked to hydrothermal fluids<sup>15,16,18,19</sup>. However, the  
 117 geochemistry and the environmental parameters controlling the development and growth of  
 118 these extremophile microbial features remain to be fully described, which is the aim of the  
 119 current work.

## 120 **Supplementary Methods**

### 121 1.1 **Whole-rock geochemistry**

122 REY data were normalized to Post Archean Average Shale (PAAS, subscript SN, Taylor and  
 123 MacLennan<sup>20</sup>), calculated as  $[REEX]/[REEX^*]$ , where  $[REEX]$  is the measured concentration of  
 124 rare earth element X, and  $[REEX^*]$  is the concentration of element X predicted by extrapolation  
 125 or interpolation from adjacent PAAS-REEs.

126 Ce anomalies ( $Ce/Ce^*$ ) were calculated using two equations:

127 Eq (1) 
$$\frac{Ce_{SN}}{Ce^*_{SN}} = \frac{2*[Ce]_{SN}}{[La]_{SN}+[Pr]_{SN}} \quad 21$$

128 Eq (2) 
$$\frac{Ce_{SN}}{Ce^*_{SN}} = \frac{[Ce]_{SN}}{([Pr]_{SN})^2/[Nd]_{SN}} \quad 22$$

129 Praesodymium anomalies ( $Pr/Pr^*$ ) were calculated using the equation of Bau and Dulski  
 130 (1996):

131 
$$\frac{Pr_{SN}}{Pr^*_{SN}} = \frac{2Pr_{SN}}{Ce_{SN} + Nd_{SN}}$$

132 Europium anomaly was calculated using the equation:

133 
$$Eu/Eu^* = \frac{2 * [Eu]_{SN}}{[Sm]_{SN} + [Gd]_{SN}}$$

134 The enrichment factor (EF; cf. Tribouvillard et al<sup>23</sup>.,) with respect to the average shale was  
 135 employed to evaluate whether an element was authigenically enriched or depleted.  $X_{-EF}$   
 136 (enrichment factor of element X) was calculated by the following equation:  $X_{-EF} =$   
 137  $(X/Al)_{sample}/(X/Al)_{ref(PAAS)}$ <sup>23,24</sup>.

### 138 1.2 **Chemical index of alteration (CIA)**

139 CIA is calculated as:  $CIA=100 \times \text{molar}[Al_2O_3/(Al_2O_3+CaO^*+Na_2O+K_2O)]$ .  $CaO^*$  corresponds  
 140 only to  $CaO$  in the silicate fraction<sup>25</sup>. Our correction procedure for  $CaO^*$  follows that in  
 141 McLennan (1993): (1)  $CaO$  is first corrected for that residing in apatite using  $P_2O_5$  data ( $CaO'$

142 =  $\text{CaO} - 10/3 \times \text{P}_2\text{O}_5$ ), and (2) if  $\text{CaO}'$  is superior to  $\text{Na}_2\text{O}$ , the final  $\text{CaO}^*$  value is set equal to  
143  $\text{Na}_2\text{O}$ , however assuming  $\text{CaO}'$  is under  $\text{Na}_2\text{O}$ , the final  $\text{CaO}^*$  is set equivalent to  $\text{CaO}'$ . The  
144 correction formula for K metasomatism followed that of Panahi et al.,<sup>26</sup>:

145  $m = \text{K}_2\text{O}/(\text{Al}_2\text{O}_3 + \text{CaO}^* + \text{Na}_2\text{O} + \text{K}_2\text{O})$  for the protolith sample

146  $\text{K}_2\text{O}_{\text{corr}} = \text{molar } [m \times \text{Al}_2\text{O}_3 + m \times (\text{CaO}^* + \text{Na}_2\text{O})]/(1 - m)$

147  $\text{CIA}_{\text{corr}} = \text{molar } \text{Al}_2\text{O}_3/(\text{Al}_2\text{O}_3 + \text{CaO}^* + \text{Na}_2\text{O} + \text{K}_2\text{O}_{\text{corr}})$

### 148 1.3 Statistical analysis

149 In this study, we used different methods including Pearson's correlation coefficient and  
150 principal component analysis (PCA). Pearson's correlation coefficient is a statistical measure  
151 of the intensity of a linear relationship between paired data. The correlation coefficient always  
152 has a value from -1 to +1, with -1 indicative of an ideal negative correlation, +1 infers a perfect  
153 positive correlation, and a value of 0 implies that there is no linear dependency between the  
154 variables 0 indicating no correlation at all. The Pearson's coefficient and (PCA) were carried  
155 out using XLSTAT software.

156

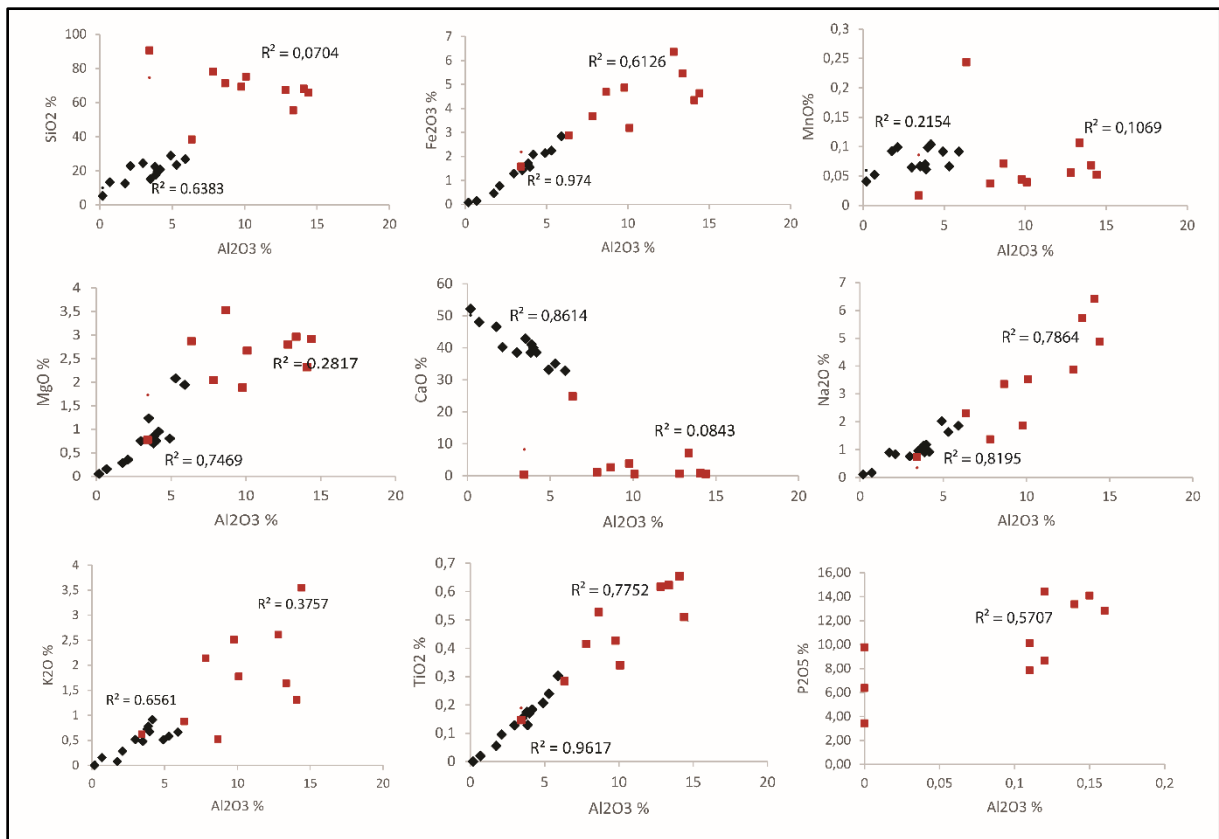

157

158 *Supplementary Figure 1 Plots of major elements vs Al<sub>2</sub>O<sub>3</sub> %*

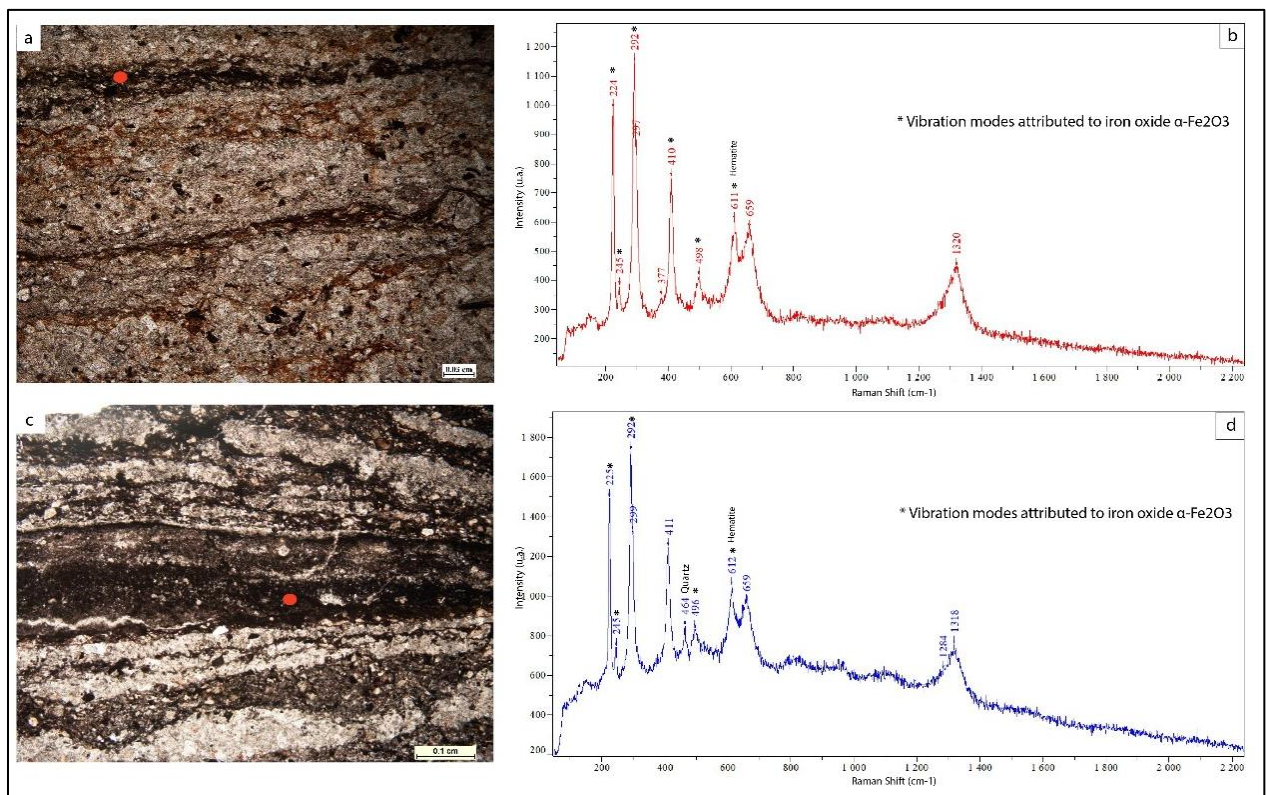

159

160 *Supplementary Figure 2 a Thin section photomicrograph of a stromatolite composed of the alternation of iron crust and*  
 161 *grain-sized laminae. b Raman spectra of the marked red point in (a). c Thin section photomicrograph of a stromatolite*  
 162 *composed of iron laminae, sparitic crusts, and grain-sized microbial laminae. d Raman spectra of the marked red point in*  
 163 *(c).*

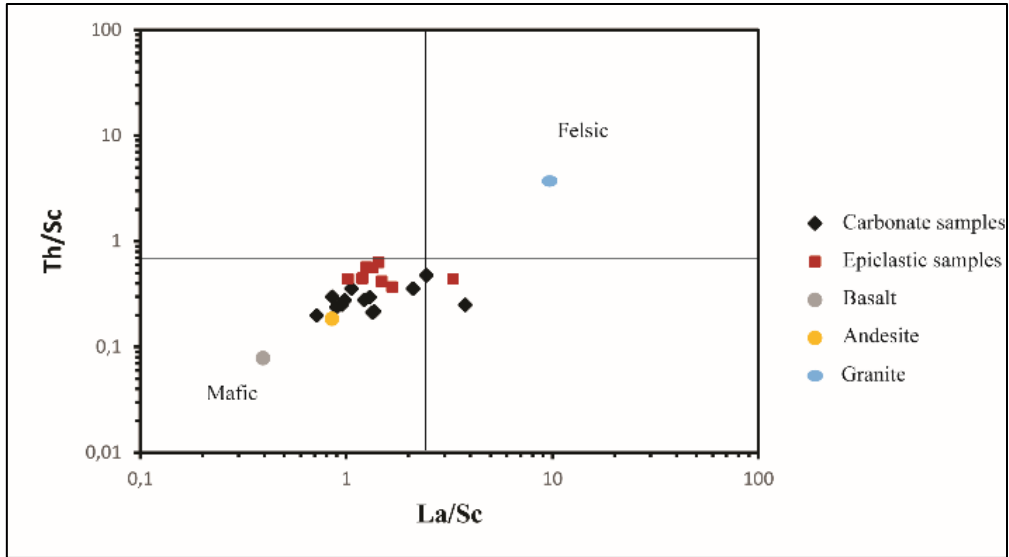

164

165  
166

Supplementary Figure 3 Th/Sc versus La/Sc diagram demonstrating a mafic provenance of Amane Tazgart samples. Note: Andesite, basalt and granite values are from Condie<sup>27</sup>.

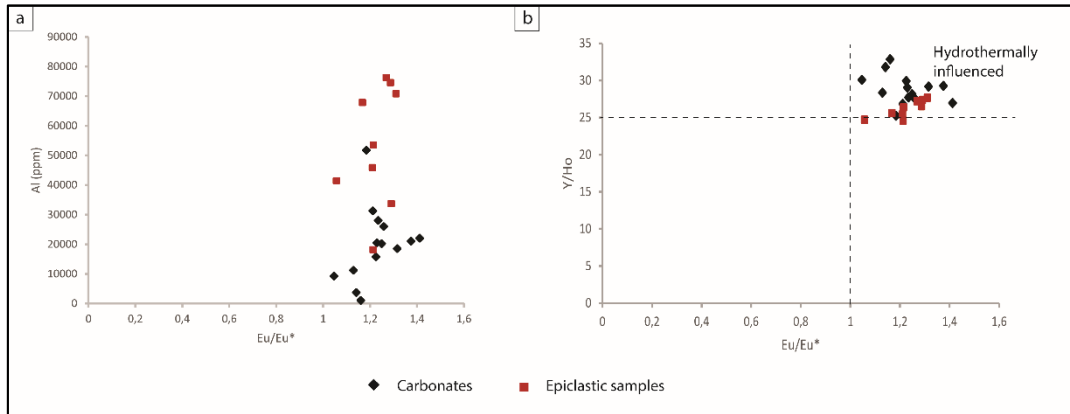

167

168

Supplementary Figure 4 a Al versus Eu/Eu\* showing no correlation. b Y/Ho versus Eu/Eu\*<sup>28</sup>.

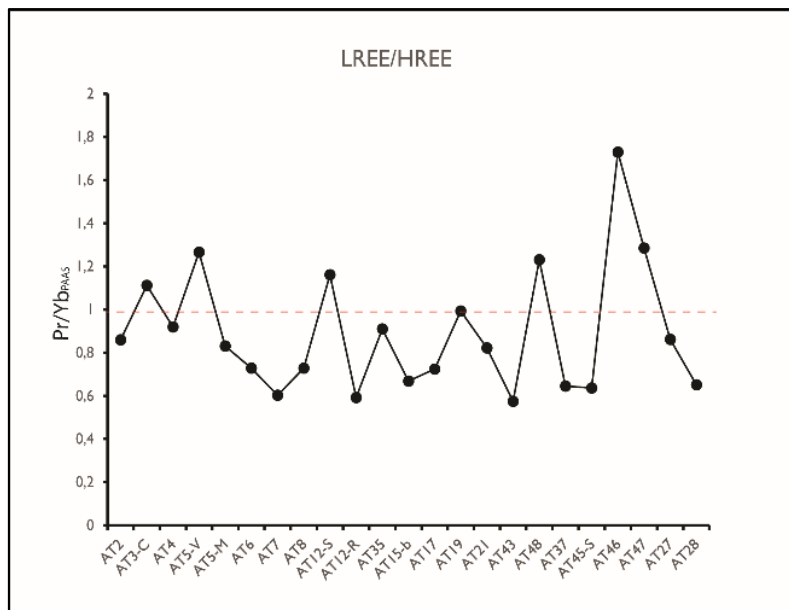

169

170  
171

Supplementary Figure 5 Pr/Yb<sub>PAAS</sub> diagram discriminating between samples enriched with LREE (Pr/Yb<sub>PAAS</sub>>1) and those enriched with HREE (Pr/Yb<sub>PAAS</sub><1).

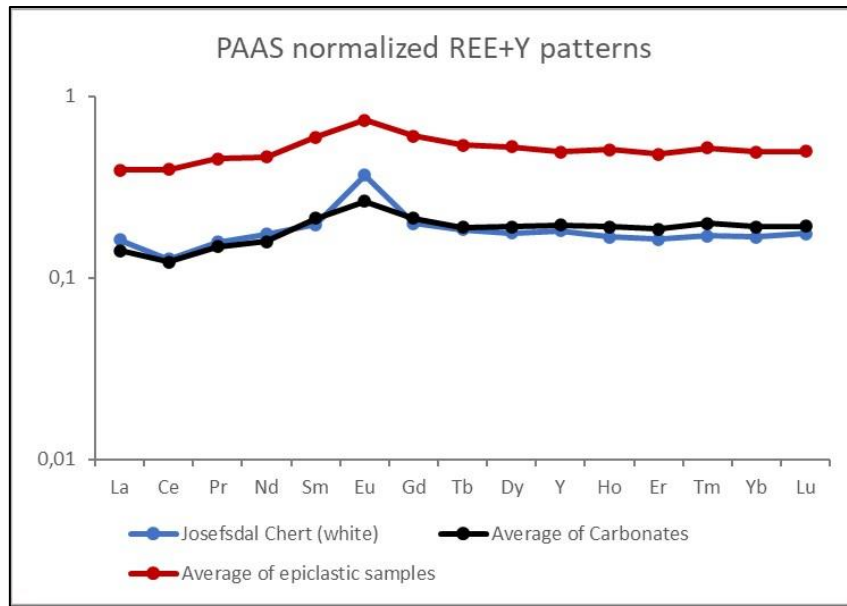

172

173

174

Supplementary Figure 6 PAAS normalized REE+Y spectra of the averages of carbonates and epiclastic samples, compared with REE+Y spectra of Josefsdal chert.

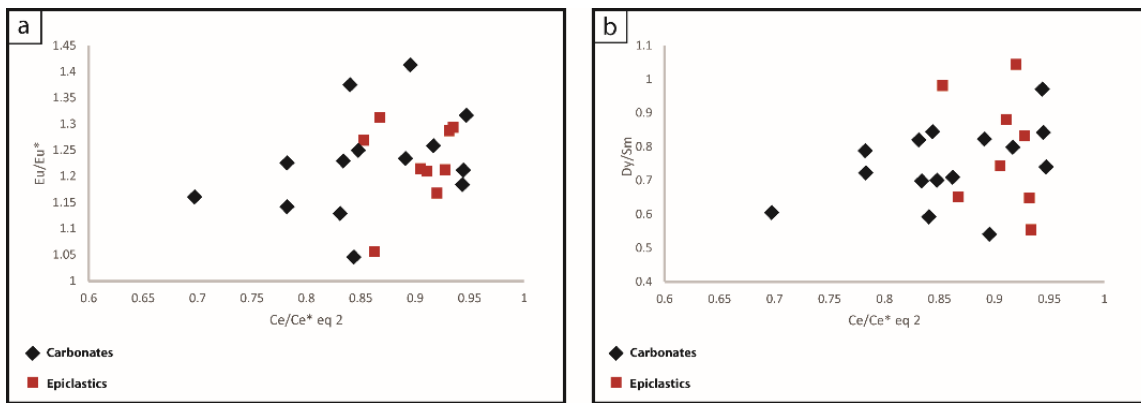

175

176

Supplementary Figure 7 Figure IV. 9 (a) Plots of Ce/Ce\* versus Eu/Eu\* (Shields and Stille <sup>29</sup>)

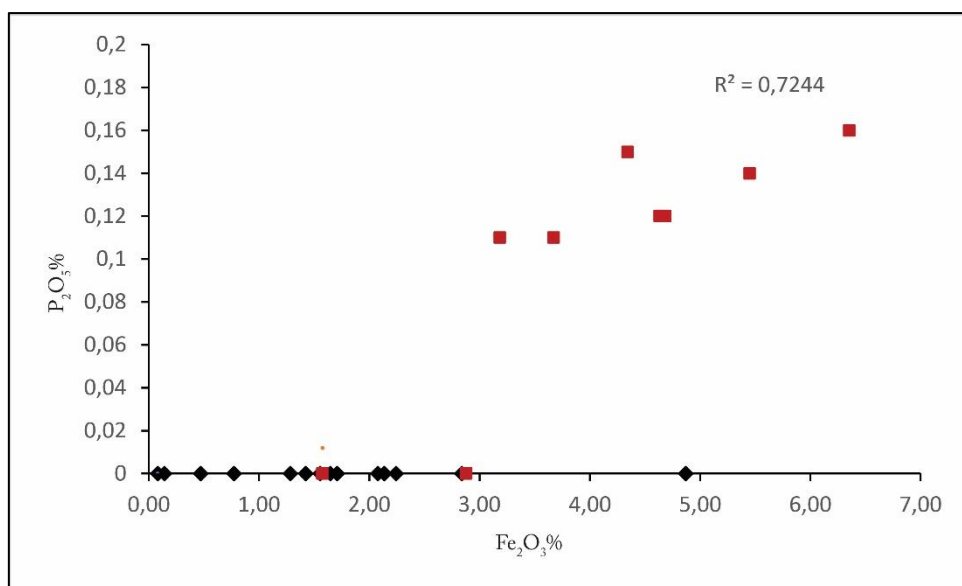

177

178

179

Supplementary Figure 8 Biplots of Fe<sub>2</sub>O<sub>3</sub>% and P<sub>2</sub>O<sub>5</sub>% showing no correlation for carbonate samples and a positive correlation for epiclastic samples.



180  
181  
182  
183

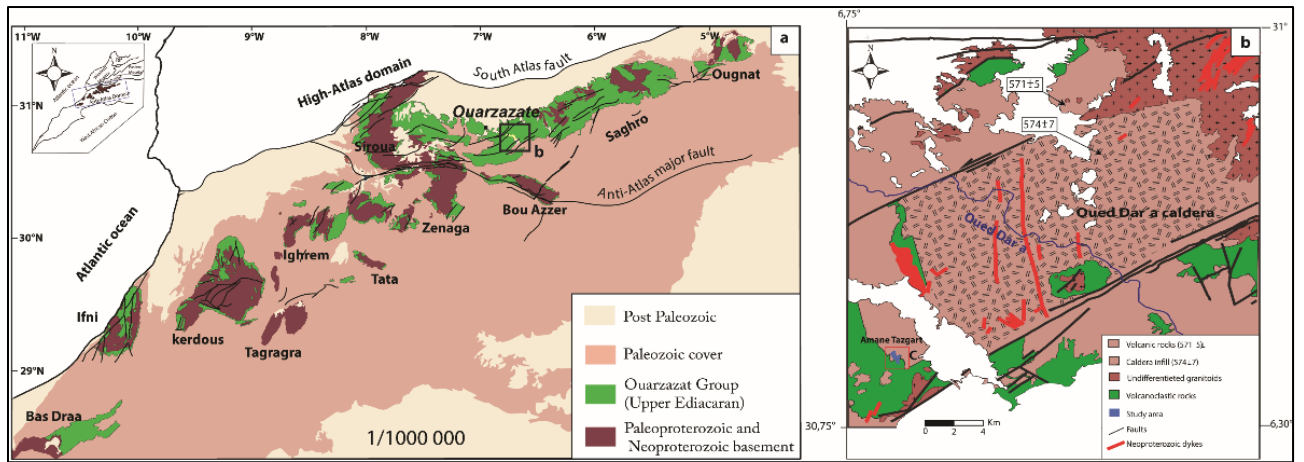

Supplementary Figure 9 a Simplified geological map of the Anti-atlas of Morocco. b Structural Map of Oued Dar'a caldera showing the localization of the studied area (modified from Chraiki et al.,<sup>18</sup>).

| <b>Samples</b> | <b>SiO<sub>2</sub></b> | <b>Al<sub>2</sub>O<sub>3</sub></b> | <b>Fe<sub>2</sub>O<sub>3</sub></b> | <b>MnO</b> | <b>MgO</b> | <b>CaO</b> | <b>Na<sub>2</sub>O</b> | <b>K<sub>2</sub>O</b> | <b>TiO<sub>2</sub></b> | <b>P<sub>2</sub>O<sub>5</sub></b> |
|----------------|------------------------|------------------------------------|------------------------------------|------------|------------|------------|------------------------|-----------------------|------------------------|-----------------------------------|
|                | %                      | %                                  | %                                  | %          | %          | %          | %                      | %                     | %                      | %                                 |
| AT2            | 19.48                  | 3.98                               | 1.55                               | 0.098      | 0.75       | 39.98      | 1.17                   | 0.67                  | 0.17                   | < L.D.                            |
| AT3-C          | 20.76                  | 4.17                               | 2.08                               | 0.10       | 0.95       | 38.54      | 0.91                   | 0.92                  | 0.18                   | < L.D.                            |
| AT4            | 17.65                  | 3.87                               | 1.71                               | 0.061      | 0.86       | 41.07      | 0.90                   | 0.78                  | 0.13                   | < L.D.                            |
| AT5-V          | 5.20                   | 0.19                               | 0.08                               | 0.041      | 0.05       | 52.13      | 0.10                   | < L.D.                | < L.D.                 | < L.D.                            |
| AT5-M          | 22.43                  | 3.82                               | 1.65                               | 0.070      | 0.70       | 38.50      | 1.13                   | 0.72                  | 0.18                   | < L.D.                            |
| AT6            | 15.19                  | 3.50                               | 1.42                               | 0.067      | 1.23       | 42.85      | 0.95                   | 0.48                  | 0.15                   | < L.D.                            |
| AT7            | 26.76                  | 5.91                               | 2.84                               | 0.092      | 1.94       | 32.80      | 1.85                   | 0.67                  | 0.30                   | < L.D.                            |
| AT8            | 24.47                  | 2.98                               | 1.28                               | 0.064      | 0.75       | 38.55      | 0.76                   | 0.52                  | 0.13                   | < L.D.                            |
| AT12-S         | 13.29                  | 0.70                               | 0.14                               | 0.052      | 0.15       | 48.00      | 0.16                   | 0.16                  | 0.020                  | < L.D.                            |
| AT12-R         | 69.21                  | 9.78                               | 4.87                               | 0.044      | 1.88       | 3.75       | 1.86                   | 2.51                  | 0.43                   | < L.D.                            |
| AT35           | 12.66                  | 1.75                               | 0.47                               | 0.092      | 0.28       | 46.56      | 0.89                   | 0.08                  | 0.055                  | < L.D.                            |
| AT15-b         | 23.43                  | 5.30                               | 2.24                               | 0.066      | 2.08       | 35.09      | 1.63                   | 0.58                  | 0.24                   | < L.D.                            |
| AT17           | 28.90                  | 4.91                               | 2.14                               | 0.092      | 0.80       | 33.16      | 2.02                   | 0.51                  | 0.21                   | < L.D.                            |
| AT19           | 22.93                  | 2.11                               | 0.77                               | 0.099      | 0.36       | 40.21      | 0.84                   | 0.28                  | 0.095                  | < L.D.                            |
| AT21           | 77.96                  | 7.83                               | 3.67                               | 0.037      | 2.05       | 1.09       | 1.36                   | 2.14                  | 0.42                   | 0.11                              |
| AT43           | 67.24                  | 12.82                              | 6.35                               | 0.056      | 2.80       | 0.64       | 3.88                   | 2.61                  | 0.62                   | 0.16                              |
| AT48           | 68.05                  | 14.08                              | 4.34                               | 0.068      | 2.31       | 0.78       | 6.42                   | 1.31                  | 0.65                   | 0.15                              |
| AT37           | 90.51                  | 3.43                               | 1.58                               | 0.017      | 0.77       | 0.33       | 0.73                   | 0.62                  | 0.15                   | < L.D.                            |
| AT45-S         | 71.23                  | 8.66                               | 4.68                               | 0.071      | 3.53       | 2.64       | 3.35                   | 0.53                  | 0.53                   | 0.12                              |
| AT46           | 38.26                  | 6.36                               | 2.88                               | 0.24       | 2.87       | 24.80      | 2.31                   | 0.88                  | 0.28                   | < L.D.                            |
| AT47           | 55.41                  | 13.37                              | 5.45                               | 0.11       | 2.96       | 7.04       | 5.72                   | 1.64                  | 0.62                   | 0.14                              |

|                                     |       |       |      |       |      |       |      |      |      |      |
|-------------------------------------|-------|-------|------|-------|------|-------|------|------|------|------|
| AT27                                | 75.13 | 10.10 | 3.19 | 0.040 | 2.67 | 0.48  | 3.51 | 1.78 | 0.34 | 0.11 |
| AT28                                | 65.71 | 14.41 | 4.64 | 0.052 | 2.92 | 0.58  | 4.87 | 3.55 | 0.51 | 0.12 |
| PAAS                                | 62.8  | 18.9  | 7.22 |       | 2.2  | 1.3   | 1.2  | 3.7  | 1    | 0.16 |
| Average of<br>carbonate             | 19.47 | 3.32  | 1.41 | 0.08  | 0.84 | 40.57 | 1.02 | 0.49 | 0.15 | 0.00 |
| Average of<br>epiclastic<br>samples | 67.87 | 10.08 | 4.16 | 0.07  | 2.47 | 4.21  | 3.40 | 1.75 | 0.45 | 0.09 |

185

186

| Samples     | As<br>µg/g | Ba<br>µg/g | Be<br>µg/g | Bi<br>µg/g | Cd<br>µg/g | Co<br>µg/g | Cr<br>µg/g | Cs<br>µg/g | Cu<br>µg/g | Ga<br>µg/g | Ge<br>µg/g | Hf<br>µg/g | In<br>µg/g | Mo<br>µg/g | Nb<br>µg/g |
|-------------|------------|------------|------------|------------|------------|------------|------------|------------|------------|------------|------------|------------|------------|------------|------------|
| AT2         | 154        | 163        | 0.58       | 0.1        | 1.52       | 4.17       | 20.7       | 6.5        | 15.8       | 4.67       | 0.57       | 0.83       | < L.D.     | 1.08       | 1.37       |
| AT3-C       | 259        | 222        | 0.63       | 0.15       | 1.13       | 6.76       | 79.3       | 8.38       | 179        | 5.53       | 0.65       | 0.96       | < L.D.     | 15.1       | 1.43       |
| AT4         | 166        | 354        | 0.55       | 0.09       | 1.37       | 5.18       | 18         | 4.81       | 11.4       | 4.97       | 0.5        | 0.83       | < L.D.     | < L.D.     | 1.36       |
| AT5-V       | 271        | 16.1       | 0.1        | < L.D.     | 1.34       | 0.15       | 2.4        | 0.21       | 30.6       | 0.2        | 0.08       | 0.09       | < L.D.     | < L.D.     | 0.06       |
| AT5-M       | 251        | 54.9       | 0.46       | 0.06       | 0.92       | 3.4        | 15.8       | 4.47       | 14.3       | 4.63       | 0.6        | 0.91       | < L.D.     | < L.D.     | 1.39       |
| AT6         | 205        | 92.1       | 0.48       | 0.09       | 1.1        | 6.34       | 20.9       | 5.41       | 14.6       | 3.88       | 0.47       | 0.81       | < L.D.     | < L.D.     | 1.33       |
| AT7         | 123        | 85.5       | 0.63       | 0.43       | 0.81       | 9.55       | 49.4       | 6.09       | 5.6        | 6.21       | 0.83       | 1.84       | < L.D.     | < L.D.     | 2.69       |
| AT8         | 108        | 47.4       | 0.44       | 0.08       | 1.3        | 3.48       | 30.4       | 6.3        | < L.D.     | 3.6        | 0.64       | 0.79       | < L.D.     | < L.D.     | 1.32       |
| AT12-S      | 183        | 59.4       | 0.11       | < L.D.     | 1.35       | 0.62       | 5.5        | 1.32       | 23.6       | 0.9        | 0.23       | 0.14       | < L.D.     | 0.63       | 0.28       |
| AT12-R      | 48.9       | 270        | 1.37       | 0.25       | 0.1        | 8.98       | 65.2       | 23.1       | 14.2       | 12         | 2.06       | 2.93       | 0.04       | < L.D.     | 4.69       |
| AT35        | 134        | 27.4       | 0.14       | 0.11       | 1.36       | 2.17       | 10.9       | 0.47       | 124        | 1.79       | 0.25       | 0.53       | < L.D.     | 1.21       | 0.76       |
| AT15-b      | 136        | 88.8       | 0.56       | 0.12       | 1.06       | 8.98       | 31.4       | 5.12       | 15.8       | 5.25       | 0.65       | 1.15       | < L.D.     | < L.D.     | 1.88       |
| AT17        | 277        | 48.5       | 0.4        | 0.15       | 0.76       | 4.45       | 37.1       | 5.63       | 2.8        | 4.27       | 0.75       | 1.18       | < L.D.     | < L.D.     | 2.03       |
| AT19        | 191        | 53         | 0.16       | 0.07       | 0.86       | 3.67       | 14.5       | 1.85       | 22.7       | 1.99       | 0.42       | 0.68       | < L.D.     | < L.D.     | 1.18       |
| AT21        | 48.7       | 296        | 1.04       | 0.23       | 0.08       | 11.7       | 43.8       | 25.6       | 6          | 10.7       | 2.94       | 2.89       | 0.04       | < L.D.     | 5.01       |
| AT43        | 30.1       | 679        | 2.14       | 0.28       | 0.05       | 12.2       | 65.9       | 21         | 30.1       | 19.1       | 2.7        | 4.58       | 0.08       | < L.D.     | 7.77       |
| AT48        | 36.5       | 511        | 0.97       | 0.15       | 0.06       | 8.91       | 96.6       | 1.68       | 5.1        | 13.2       | 1.64       | 4.35       | 0.04       | < L.D.     | 6.82       |
| AT37        | 22.7       | 189        | 0.52       | 0.11       | 0.03       | 3.92       | 21.5       | 7.26       | 4.8        | 4.9        | 1.71       | 1.69       | < L.D.     | < L.D.     | 1.93       |
| AT45-S      | 77.2       | 113        | 0.82       | 0.2        | 0.06       | 10.8       | 72.8       | 1.71       | 4          | 11         | 1.57       | 3.58       | 0.03       | < L.D.     | 5.99       |
| AT46        | 46.6       | 181        | 0.58       | 0.13       | 0.07       | 8.16       | 39.3       | 0.8        | 31.4       | 8.39       | 1.25       | 1.82       | 0.06       | < L.D.     | 3.29       |
| AT47        | 42.3       | 705        | 0.99       | 0.25       | 0.1        | 10.9       | 85.5       | 1.51       | 4.8        | 14.2       | 1.64       | 3.68       | 0.05       | < L.D.     | 5.83       |
| AT27        | 66.7       | 821        | 0.79       | 0.23       | 0.03       | 10.6       | 38.7       | 4.79       | 9.4        | 10.6       | 1.43       | 2.77       | 0.03       | 7.23       | 4.98       |
| AT28        | 76.5       | 1456       | 0.88       | 0.25       | 0.03       | 12         | 38.2       | 1.42       | 8.3        | 12.3       | 1.5        | 4.22       | 0.03       | < L.D.     | 6.18       |
| PAAS        |            | 650        |            |            |            | 23         | 110        |            |            |            | 5          |            | 1          | 19         |            |
| Aver. of Ca | 189.24     | 100.89     | 0.4        | 0.13       | 1.14       | 4.53       | 25.86      | 4.35       | 38.34      | 3.68       | 0.51       | 0.83       | 0          | 4.49       | 1.31       |

|             |        |        |      |      |       |      |       |      |       |       |      |      |      |      |      |
|-------------|--------|--------|------|------|-------|------|-------|------|-------|-------|------|------|------|------|------|
| Aver. of Ep | 49.62  | 522.18 | 1.01 | 0.21 | 0.06  | 9.81 | 56.75 | 8.88 | 11.82 | 11.64 | 1.84 | 3.25 | 0.05 | 7.23 | 5.25 |
| UCC         | 1.5    | 550    |      |      | 0.098 | 17   | 83    |      | 25    |       |      | 5.8  |      | 1.5  | 12   |
| Ca/Ep       | 3.82   | 0.19   | 0.40 | 0.63 | 19.83 | 0.46 | 0.46  | 0.49 | 3.24  | 0.32  | 0.28 | 0.25 | 0.00 | 0.62 | 0.25 |
| Ca/UCC      | 126.16 | 0.18   | 0.00 | 0.00 | 11.67 | 0.27 | 0.31  | 0.00 | 1.53  | 0.00  | 0.00 | 0.14 | 0.00 | 2.99 | 0.11 |
| Ep/UCC      | 33.08  | 0.95   | 0.00 | 0.00 | 0.59  | 0.58 | 0.68  | 0.00 | 0.47  | 0.00  | 0.00 | 0.56 | 0.00 | 4.82 | 0.44 |

188

189

| Samples | Ni<br>µg/g | Pb<br>µg/g | Rb<br>µg/g | Sb<br>µg/g | Sc<br>µg/g | Sn<br>µg/g | Sr<br>µg/g | Ta<br>µg/g | Th<br>µg/g | U<br>µg/g | V<br>µg/g | W<br>µg/g | Zn<br>µg/g | Zr<br>µg/g |
|---------|------------|------------|------------|------------|------------|------------|------------|------------|------------|-----------|-----------|-----------|------------|------------|
| AT2     | 6.1        | 3.61       | 44.2       | 4.01       | 4.96       | 0.34       | 190        | 0.12       | 1.05       | 6.37      | 18.8      | 1.64      | 27.3       | 29.6       |
| AT3-C   | 9.6        | 10.9       | 54.5       | 8.23       | 5.19       | 2.17       | 229        | 0.13       | 1.13       | 8.69      | 33.2      | 18.8      | 116        | 35.5       |
| AT4     | 7.2        | 4.10       | 39.4       | 8.67       | 4.63       | 0.30       | 198        | 0.13       | 1.37       | 8.97      | 20.8      | 0.86      | 20.7       | 28.2       |
| AT5-V   | < L.D.     | 1.59       | 1.95       | 0.42       | < L.D.     | 0.64       | 213        | < L.D.     | 0.05       | 4.77      | 2.8       | < L.D.    | 19.0       | 6.68       |
| AT5-M   | 4.8        | 2.84       | 60.7       | 5.49       | 4.49       | < L.D.     | 259        | 0.13       | 1.13       | 7.60      | 44.0      | < L.D.    | 17.3       | 32.2       |
| AT6     | 7.2        | 3.31       | 29.1       | 3.78       | 4.10       | < L.D.     | 199        | 0.12       | 0.97       | 6.65      | 21.5      | < L.D.    | 26.7       | 29.4       |
| AT7     | 17.3       | 6.65       | 38.6       | 6.63       | 7.90       | 1.07       | 138        | 0.25       | 2.36       | 16.2      | 51.1      | 1.09      | 36.1       | 64.8       |
| AT8     | 6.3        | 3.19       | 34.1       | 3.67       | 3.87       | < L.D.     | 151        | 0.12       | 1.08       | 9.33      | 19.7      | < L.D.    | 18.6       | 27.8       |
| AT12-S  | < L.D.     | 1.21       | 8.24       | 1.30       | 0.85       | < L.D.     | 224        | 0.03       | 0.21       | 6.69      | 4.9       | 0.85      | 9.4        | 5.12       |
| AT12-R  | 17.0       | 8.58       | 131        | 11.3       | 12.21      | 1.50       | 54.1       | 0.45       | 4.37       | 18.5      | 65.1      | 0.83      | 30.5       | 101        |
| AT35    | 2.6        | 3.45       | 3.34       | 1.43       | 1.77       | < L.D.     | 186        | 0.10       | 0.63       | 2.71      | 11.1      | < L.D.    | 14.2       | 19.1       |
| AT15-b  | 9.9        | 3.44       | 34.1       | 3.50       | 6.72       | 0.37       | 189        | 0.17       | 1.34       | 6.92      | 31.7      | < L.D.    | 38.6       | 40.1       |
| AT17    | 8.8        | 4.67       | 30.5       | 6.72       | 5.68       | 0.41       | 184        | 0.18       | 1.57       | 9.56      | 47.3      | 0.82      | 16.0       | 40.6       |
| AT19    | 7.3        | 1.95       | 16.7       | 3.36       | 1.99       | < L.D.     | 191        | 0.12       | 0.95       | 4.34      | 11.1      | < L.D.    | 11.6       | 23.8       |
| AT21    | 16.6       | 6.00       | 140        | 14.2       | 8.72       | 0.97       | 53.9       | 0.45       | 3.90       | 7.75      | 55.5      | < L.D.    | 38.3       | 98.8       |
| AT43    | 32.0       | 15.6       | 120        | 6.81       | 16.59      | 2.25       | 200        | 0.75       | 7.34       | 9.47      | 103       | < L.D.    | 124        | 151        |
| AT48    | 15.9       | 9.08       | 34.4       | 2.69       | 14.40      | 1.13       | 310        | 0.65       | 6.05       | 5.19      | 63.7      | < L.D.    | 62.1       | 144        |
| AT37    | 7.3        | 5.06       | 39.8       | 9.99       | 3.10       | 0.39       | 34.1       | 0.19       | 1.77       | 7.56      | 27.7      | < L.D.    | 42.3       | 63.8       |
| AT45-S  | 13.8       | 9.51       | 13.4       | 8.35       | 9.14       | 1.21       | 42.7       | 0.56       | 5.18       | 33.0      | 48.7      | < L.D.    | 75.4       | 127        |
| AT46    | 13.3       | 6.49       | 13.7       | 5.58       | 6.18       | 0.64       | 114        | 0.31       | 2.73       | 14.2      | 35.7      | < L.D.    | 48.4       | 65.2       |

|             |       |       |       |       |       |      |        |      |      |       |       |      |       |        |
|-------------|-------|-------|-------|-------|-------|------|--------|------|------|-------|-------|------|-------|--------|
| AT47        | 19.2  | 15.30 | 37.60 | 3.56  | 14    | 1.16 | 328.00 | 0.6  | 5.1  | 6.98  | 72.6  | 0.8  | 90.4  | 124.0  |
| AT27        | 14.2  | 15.3  | 51.8  | 9.39  | 8.62  | 1.00 | 136    | 0.47 | 5.45 | 3.37  | 113   | 1.28 | 62.5  | 96.2   |
| AT28        | 13.8  | 10.3  | 78.2  | 5.56  | 11.64 | 1.06 | 238    | 0.64 | 6.60 | 3.47  | 93.3  | 0.86 | 64.6  | 141    |
| PAAS        | 55    | 20    | 160   | 200   | 16    |      | 200    | 1.2  | 14.6 | 3.1   | 150   |      | 85    | 210    |
| Aver. of Ca | 7.92  | 3.92  | 30.43 | 4.40  | 4.35  | 0.76 | 196.30 | 0.13 | 1.07 | 7.60  | 24.45 | 4.01 | 28.59 | 29.45  |
| Aver. of Ep | 16.30 | 10.12 | 66.04 | 7.74  | 10.44 | 1.13 | 151.02 | 0.50 | 4.85 | 10.95 | 67.87 | 0.95 | 63.88 | 111.18 |
| UCC         | 44    | 0.5   | 112   | 0.2   |       |      | 350    | 1    | 10.7 | 2.8   | 1.7   | 2    | 71    | 190    |
| Ca/Ep       | 0.49  | 0.39  | 0.46  | 0.57  | 0.42  | 0.67 | 1.30   | 0.26 | 0.22 | 0.69  | 0.36  | 4.24 | 0.45  | 0.26   |
| Ca/UCC      | 0.18  | 7.84  | 0.27  | 22.00 | 0.00  | 0.00 | 0.56   | 0.13 | 0.10 | 2.71  | 14.38 | 2.01 | 0.40  | 0.15   |
| Ep/UCC      | 0.37  | 20.25 | 0.59  | 38.70 | 0.00  | 0.00 | 0.43   | 0.50 | 0.45 | 3.91  | 39.92 | 0.47 | 0.90  | 0.59   |

190

191

192  
193  
194  
195

*Supplementary Table 3 Data of Cerium anomalies (Ce/Ce\* and Ce/Ce\* Eq 2) calculated using the equation of Bau and Dulski<sup>21</sup> and Lawrence et al.,<sup>30</sup> respectively, Praseodymium anomalies (Pr/Pr\*) calculated using the equation of Bau and Dulski<sup>21</sup>, Europium anomalies (Eu/Eu\*), Y/Ho and Pr/Yb ratios. Note : REY data were normalized to Post Archean Average Shale (PAAS).*

| <b>Samples</b> | <b>Ce<sub>N</sub>/Ce<sub>N</sub>*</b> | <b>Pr<sub>N</sub>/Pr<sub>N</sub>*</b> | <b>Ce<sub>N</sub>/Ce<sub>N</sub>*<sub>eq 2</sub></b> | <b>Y/Ho</b> | <b>Eu<sub>N</sub>/Eu<sub>N</sub>*</b> | <b>Pr<sub>N</sub>/Yb<sub>N</sub></b> |
|----------------|---------------------------------------|---------------------------------------|------------------------------------------------------|-------------|---------------------------------------|--------------------------------------|
| AT2            | 0.79                                  | 1.07                                  | 0.84                                                 | 29.26       | 1.38                                  | 0.86                                 |
| AT3-C          | 0.88                                  | 1.04                                  | 0.90                                                 | 26.97       | 1.41                                  | 1.11                                 |
| AT4            | 0.82                                  | 1.09                                  | 0.83                                                 | 29.04       | 1.23                                  | 0.92                                 |
| AT5-V          | 0.66                                  | 1.15                                  | 0.70                                                 | 32.85       | 1.16                                  | 1.27                                 |
| AT5-M          | 0.85                                  | 1.08                                  | 0.85                                                 | 28.16       | 1.25                                  | 0.83                                 |
| AT6            | 0.84                                  | 1.01                                  | 0.95                                                 | 29.17       | 1.32                                  | 0.73                                 |
| AT7            | 0.89                                  | 1.02                                  | 0.94                                                 | 26.83       | 1.21                                  | 0.60                                 |
| AT8            | 0.73                                  | 1.11                                  | 0.78                                                 | 29.93       | 1.23                                  | 0.73                                 |
| AT12-S         | 0.73                                  | 1.11                                  | 0.78                                                 | 31.79       | 1.14                                  | 1.16                                 |
| AT12-R         | 0.93                                  | 1.03                                  | 0.94                                                 | 25.24       | 1.18                                  | 0.59                                 |
| AT35           | 0.90                                  | 1.08                                  | 0.84                                                 | 30.08       | 1.05                                  | 0.91                                 |
| AT15-b         | 0.83                                  | 1.04                                  | 0.89                                                 | 27.72       | 1.23                                  | 0.67                                 |
| AT17           | 0.85                                  | 1.03                                  | 0.92                                                 | 27.60       | 1.26                                  | 0.72                                 |
| AT19           | 0.81                                  | 1.09                                  | 0.83                                                 | 28.34       | 1.13                                  | 0.99                                 |
| AT21           | 0.87                                  | 1.06                                  | 0.86                                                 | 24.69       | 1.06                                  | 0.82                                 |
| AT43           | 0.87                                  | 1.04                                  | 0.92                                                 | 25.60       | 1.17                                  | 0.57                                 |
| AT48           | 1.04                                  | 1.04                                  | 0.93                                                 | 26.51       | 1.29                                  | 1.23                                 |
| AT37           | 0.87                                  | 1.03                                  | 0.93                                                 | 24.57       | 1.21                                  | 0.65                                 |
| AT45-S         | 0.95                                  | 1.05                                  | 0.91                                                 | 25.41       | 1.21                                  | 0.64                                 |
| AT46           | 0.95                                  | 1.03                                  | 0.93                                                 | 27.34       | 1.29                                  | 1.73                                 |
| AT47           | 0.97                                  | 1.07                                  | 0.87                                                 | 27.66       | 1.31                                  | 1.28                                 |
| AT27           | 0.91                                  | 1.05                                  | 0.91                                                 | 26.38       | 1.21                                  | 0.86                                 |
| AT28           | 0.87                                  | 1.08                                  | 0.85                                                 | 27.19       | 1.27                                  | 0.65                                 |
| Average        | 0.86                                  | 1.06                                  | 0.87                                                 | 27.75       | 1.23                                  | 0.89                                 |

196

|        | La    | Ce    | Pr   | Nd    | Sm   | Eu   | Gd   | Tb   | Dy   | Y     | Ho   | Er   | Tm   | Yb   | Lu   | ΣREE   |
|--------|-------|-------|------|-------|------|------|------|------|------|-------|------|------|------|------|------|--------|
|        | μg/g  | μg/g  | μg/g | μg/g  | μg/g | μg/g | μg/g | μg/g | μg/g | μg/g  | μg/g | μg/g | μg/g | μg/g | μg/g | μg/g   |
| AT2    | 6.63  | 11.10 | 1.61 | 6.73  | 1.50 | 0.39 | 1.18 | 0.15 | 0.89 | 5.53  | 0.19 | 0.55 | 0.09 | 0.60 | 0.10 | 37.29  |
| AT3-C  | 7.08  | 14.40 | 1.99 | 8.56  | 1.97 | 0.51 | 1.44 | 0.19 | 1.07 | 5.72  | 0.21 | 0.58 | 0.09 | 0.57 | 0.09 | 44.47  |
| AT4    | 6.00  | 10.20 | 1.39 | 5.43  | 1.09 | 0.26 | 0.91 | 0.13 | 0.76 | 4.68  | 0.16 | 0.46 | 0.07 | 0.48 | 0.08 | 32.10  |
| AT5-V  | 1.36  | 1.99  | 0.35 | 1.52  | 0.32 | 0.07 | 0.26 | 0.03 | 0.19 | 1.27  | 0.04 | 0.10 | 0.01 | 0.09 | 0.02 | 7.63   |
| AT5-M  | 4.27  | 7.99  | 1.11 | 4.51  | 0.91 | 0.22 | 0.73 | 0.10 | 0.64 | 3.83  | 0.14 | 0.40 | 0.06 | 0.43 | 0.07 | 25.40  |
| AT6    | 3.67  | 6.70  | 0.92 | 4.11  | 0.95 | 0.24 | 0.80 | 0.12 | 0.71 | 4.23  | 0.15 | 0.40 | 0.06 | 0.40 | 0.06 | 23.52  |
| AT7    | 6.75  | 12.90 | 1.66 | 6.99  | 1.63 | 0.39 | 1.42 | 0.22 | 1.37 | 8.09  | 0.30 | 0.86 | 0.13 | 0.88 | 0.14 | 43.73  |
| AT8    | 4.72  | 7.16  | 1.07 | 4.35  | 0.93 | 0.22 | 0.79 | 0.12 | 0.73 | 4.80  | 0.16 | 0.45 | 0.07 | 0.47 | 0.08 | 26.14  |
| AT12-S | 3.21  | 4.85  | 0.72 | 2.92  | 0.58 | 0.13 | 0.50 | 0.07 | 0.42 | 2.79  | 0.09 | 0.23 | 0.03 | 0.20 | 0.03 | 16.76  |
| AT12-R | 12.90 | 23.60 | 2.65 | 9.70  | 2.04 | 0.48 | 1.76 | 0.30 | 1.98 | 11.10 | 0.44 | 1.31 | 0.21 | 1.43 | 0.22 | 70.08  |
| AT35   | 3.73  | 7.56  | 1.00 | 3.88  | 0.69 | 0.14 | 0.61 | 0.09 | 0.59 | 3.80  | 0.13 | 0.35 | 0.05 | 0.35 | 0.05 | 23.05  |
| AT15-b | 4.82  | 9.10  | 1.30 | 5.77  | 1.26 | 0.31 | 1.11 | 0.17 | 1.04 | 6.37  | 0.23 | 0.62 | 0.10 | 0.62 | 0.10 | 32.91  |
| AT17   | 5.57  | 10.60 | 1.50 | 6.67  | 1.92 | 0.49 | 1.73 | 0.26 | 1.54 | 8.08  | 0.29 | 0.74 | 0.11 | 0.66 | 0.10 | 40.31  |
| AT19   | 4.87  | 8.08  | 1.09 | 4.23  | 0.74 | 0.17 | 0.64 | 0.10 | 0.61 | 3.65  | 0.13 | 0.35 | 0.05 | 0.35 | 0.06 | 25.11  |
| AT21   | 10.40 | 21.80 | 3.12 | 13.30 | 3.52 | 0.72 | 2.94 | 0.44 | 2.50 | 11.70 | 0.48 | 1.22 | 0.19 | 1.21 | 0.19 | 73.75  |
| AT43   | 16.90 | 29.10 | 3.56 | 13.80 | 3.02 | 0.73 | 2.86 | 0.49 | 3.15 | 17.20 | 0.67 | 1.88 | 0.29 | 1.98 | 0.31 | 95.95  |
| AT48   | 21.40 | 52.40 | 6.24 | 24.00 | 4.76 | 1.17 | 3.83 | 0.55 | 3.08 | 15.90 | 0.60 | 1.60 | 0.25 | 1.62 | 0.26 | 137.64 |
| AT37   | 3.87  | 7.00  | 0.90 | 3.70  | 0.90 | 0.22 | 0.80 | 0.12 | 0.75 | 3.79  | 0.15 | 0.42 | 0.07 | 0.45 | 0.07 | 23.21  |
| AT45-S | 12.20 | 25.60 | 3.17 | 12.40 | 2.70 | 0.64 | 2.28 | 0.37 | 2.37 | 13.10 | 0.52 | 1.48 | 0.24 | 1.59 | 0.25 | 78.93  |
| AT46   | 20.30 | 41.60 | 5.03 | 19.60 | 3.91 | 0.97 | 3.22 | 0.41 | 2.16 | 11.20 | 0.41 | 1.02 | 0.15 | 0.93 | 0.14 | 111.16 |
| AT47   | 23.00 | 54.10 | 7.08 | 27.80 | 5.70 | 1.47 | 4.89 | 0.70 | 3.71 | 19.50 | 0.71 | 1.84 | 0.27 | 1.76 | 0.27 | 152.77 |
| AT27   | 12.30 | 24.80 | 3.16 | 12.70 | 2.67 | 0.61 | 2.09 | 0.33 | 1.98 | 10.80 | 0.41 | 1.13 | 0.18 | 1.17 | 0.18 | 74.50  |
| AT28   | 14.50 | 27.80 | 3.72 | 14.70 | 2.65 | 0.69 | 2.48 | 0.38 | 2.59 | 16.70 | 0.61 | 1.77 | 0.28 | 1.83 | 0.29 | 91.05  |
| PAAS   | 38.20 | 79.60 | 8.83 | 33.90 | 5.55 | 1.08 | 4.66 | 0.77 | 4.68 | 27.00 | 0.99 | 2.85 | 0.41 | 2.82 | 0.43 | 211.77 |



|        | <b>EF As</b> | <b>EF Co</b> | <b>EF Cr</b> | <b>EF Cu</b> | <b>EF Mo</b> | <b>EF Ni</b> | <b>EF Th</b> | <b>EF U</b> | <b>EF V</b> | <b>EF Zn</b> | <b>EF Cd</b> | <b>EF (P)</b> | <b>Cu/Zn</b> |
|--------|--------------|--------------|--------------|--------------|--------------|--------------|--------------|-------------|-------------|--------------|--------------|---------------|--------------|
| AT2    | 391.76       | 0.86         | 0.89         | 2.41         | 5.12         | 0.53         | 0.34         | 9.76        | 0.59        | 1.53         | 59.08        | <L.D.         | 0.58         |
| AT3-C  | 628.76       | 1.33         | 3.27         | 26.10        | 68.29        | 0.79         | 0.35         | 12.72       | 1.00        | 6.21         | 41.88        | <L.D.         | 1.54         |
| AT4    | 435.30       | 1.10         | 0.80         | 1.79         | <L.D.        | 0.64         | 0.46         | 14.13       | 0.68        | 1.19         | 54.84        | <L.D.         | 0.55         |
| AT5-V  | 14619.4<br>4 | 0.65         | 2.20         | 98.95        | <L.D.        | <L.D.        | 0.32         | 154.69      | 1.86        | 22.53        | 1105.85      | <L.D.         | 1.61         |
| AT5-M  | 666.29       | 0.73         | 0.71         | 2.28         | <L.D.        | 0.43         | 0.39         | 12.14       | 1.45        | 1.01         | 37.26        | <L.D.         | 0.83         |
| AT6    | 593.44       | 1.49         | 1.03         | 2.54         | <L.D.        | 0.70         | 0.36         | 11.57       | 0.77        | 1.69         | 48.79        | <L.D.         | 0.55         |
| AT7    | 211.21       | 1.33         | 1.43         | 0.57         | <L.D.        | 1.01         | 0.52         | 16.73       | 1.09        | 1.36         | 21.29        | <L.D.         | 0.15         |
| AT8    | 364.95       | 0.96         | 1.75         | <L.D.        | <L.D.        | 0.72         | 0.47         | 19.07       | 0.83        | 1.39         | 67.38        | <L.D.         | <L.D.        |
| AT12-S | 2656.91      | 0.74         | 1.35         | 20.55        | 16.93        | <L.D.        | 0.39         | 58.44       | 0.88        | 2.98         | 299.14       | <L.D.         | 2.52         |
| AT12-R | 50.60        | 0.75         | 1.15         | 0.88         | <L.D.        | 0.60         | 0.58         | 11.51       | 0.84        | 0.69         | 1.65         | <L.D.         | 0.47         |
| AT35   | 778.15       | 1.02         | 1.07         | 43.01        | 13.11        | 0.50         | 0.47         | 9.46        | 0.80        | 1.80         | 120.15       | <L.D.         | 8.74         |
| AT15-b | 260.07       | 1.39         | 1.02         | 1.81         | <L.D.        | 0.64         | 0.33         | 7.96        | 0.75        | 1.62         | 30.88        | <L.D.         | 0.41         |
| AT17   | 572.36       | 0.75         | 1.30         | 0.34         | <L.D.        | 0.62         | 0.41         | 11.88       | 1.21        | 0.73         | 23.91        | <L.D.         | 0.17         |
| AT19   | 917.69       | 1.43         | 1.18         | 6.53         | <L.D.        | 1.19         | 0.58         | 12.52       | 0.66        | 1.22         | 63.40        | <L.D.         | 1.97         |
| AT21   | 62.93        | 1.22         | 0.96         | 0.46         | <L.D.        | 0.73         | 0.65         | 6.04        | 0.89        | 1.09         | 1.57         | 1.77          | 0.16         |
| AT43   | 23.80        | 0.78         | 0.88         | 1.43         | <L.D.        | 0.86         | 0.74         | 4.50        | 1.01        | 2.16         | 0.65         | 1.57          | 0.24         |
| AT48   | 26.23        | 0.52         | 1.18         | 0.22         | <L.D.        | 0.39         | 0.56         | 2.25        | 0.57        | 0.98         | 0.65         | 1.34          | 0.08         |
| AT37   | 67.02        | 0.94         | 1.08         | 0.85         | <L.D.        | 0.73         | 0.67         | 13.44       | 1.02        | 2.74         | 1.33         | <L.D.         | 0.11         |
| AT45-S | 90.24        | 1.03         | 1.44         | 0.28         | <L.D.        | 0.55         | 0.77         | 23.26       | 0.71        | 1.94         | 1.02         | 1.74          | 0.05         |
| AT46   | 74.23        | 1.05         | 1.06         | 3.00         | <L.D.        | 0.72         | 0.56         | 13.57       | 0.71        | 1.69         | 1.63         | <L.D.         | 0.65         |
| AT47   | 32.03        | 0.67         | 1.10         | 0.22         | <L.D.        | 0.49         | 0.50         | 3.18        | 0.68        | 1.50         | 0.81         | 1.32          | 0.05         |
| AT27   | 66.91        | 0.86         | 0.66         | 0.57         | 13.54        | 0.48         | 0.70         | 2.04        | 1.42        | 1.38         | 0.40         | 1.37          | 0.15         |
| AT28   | 53.75        | 0.69         | 0.46         | 0.35         | <L.D.        | 0.33         | 0.59         | 1.47        | 0.82        | 1.00         | 0.33         | 1.05          | 0.13         |

|                                  | Sample    | Sr (ppm) | Ba (ppm) | Ga (ppm) | B (ppm) | K%   | Sr/Ba  | B/K    | B/Ga  |      |
|----------------------------------|-----------|----------|----------|----------|---------|------|--------|--------|-------|------|
| Triassic Zhangjiatan formation   | ZK702H1   | 163.3    | 546.3    | 18.7     | 21.06   |      | 2.46   | 0.30   | 8.57  | 1.13 |
|                                  | ZK702H6   | 110.4    | 380.9    | 22.1     | 22.81   |      | 3      | 0.29   | 7.61  | 1.03 |
|                                  | ZK702H8   | 117.2    | 536.4    | 17.6     | 15.21   |      | 2.52   | 0.22   | 6.03  | 0.86 |
|                                  | ZK702H14  | 162      | 515.7    | 23.7     | 32.08   |      | 1.87   | 0.31   | 17.18 | 1.35 |
|                                  | ZK702H18  | 229.8    | 463.4    | 19.2     | 15.51   |      | 1.54   | 0.50   | 10.1  | 0.81 |
|                                  | ZK702H24  | 384.9    | 774.6    | 22.1     | 14.7    |      | 1.24   | 0.50   | 11.88 | 0.67 |
|                                  | ZK702H32  | 328.2    | 792.6    | 24.1     | 19.57   |      | 1.97   | 0.41   | 9.95  | 0.81 |
|                                  | ZK702H35  | 506.5    | 830.6    | 18.5     | 18.91   |      | 3.41   | 0.61   | 5.54  | 1.02 |
|                                  | ZK1501H1  | 137.2    | 462.1    | 17.1     | 14.5    |      | 2.41   | 0.30   | 6.02  | 0.85 |
|                                  | ZK1501H3  | 185      | 562.4    | 21       | 18.44   |      | 1.76   | 0.33   | 10.48 | 0.88 |
|                                  | ZK1501H6  | 151.7    | 438.5    | 22       | 20.86   |      | 1.58   | 0.35   | 13.23 | 0.95 |
|                                  | ZK1501H11 | 438.8    | 765.1    | 22.5     | 20      |      | 1.69   | 0.57   | 11.87 | 0.89 |
|                                  | ZK1501H15 | 425      | 849.8    | 22.7     | 26.56   |      | 1.96   | 0.50   | 13.56 | 1.17 |
|                                  | ZK2709H3  | 192.4    | 649.5    | 19       | 29.5    |      | 2.1    | 0.30   | 14.05 | 1.55 |
|                                  | ZK2709H6  | 182      | 612      | 17.9     | 43.8    |      | 1.85   | 0.30   | 23.66 | 2.45 |
| ZK2709H8                         | 177.7     | 662      | 20.5     | 51       |         | 2.32 | 0.27   | 21.94  | 2.49  |      |
| Ediacaran Amane Tazgat formation | AT2       | 189.98   | 162.76   | 4.67     | 17.5    |      | 0.56   | 1.17   | 31.42 | 3.75 |
|                                  | AT3-C     | 228.87   | 222.03   | 5.53     | 26.7    |      | 0.76   | 1.03   | 35.15 | 4.83 |
|                                  | AT4       | 198.19   | 353.83   | 4.97     | 26.2    |      | 0.65   | 0.56   | 40.41 | 5.27 |
|                                  | AT5-V     | 213.31   | 16.06    | 0.2      | 19.5    | <L.D | 13.28  | <L.D   | 97.50 |      |
|                                  | AT5-M     | 259.07   | 54.85    | 4.63     | 30.3    | 0.6  | 4.72   | 50.48  | 6.54  |      |
|                                  | AT6       | 199.27   | 92.15    | 3.88     | 19.7    | 0.4  | 2.16   | 49.44  | 5.08  |      |
|                                  | AT7       | 138.2    | 85.47    | 6.21     | 11.2    | 0.55 | 1.62   | 20.23  | 1.80  |      |
|                                  | AT8       | 150.88   | 47.38    | 3.6      | 11.8    | 0.43 | 3.18   | 27.6   | 3.28  |      |
|                                  | AT12-S    | 223.98   | 59.37    | 0.9      | 20.9    | 0.13 | 3.77   | 160.36 | 23.22 |      |
|                                  | AT12-R    | 54.08    | 270.49   | 11.99    | 35.6    | 2.08 | 0.20   | 17.09  | 2.97  |      |
| AT35                             | 185.77    | 27.37    | 1.79     | 12.3     | 0.06    | 6.79 | 189.96 | 6.87   |       |      |
| AT15-b                           | 188.88    | 88.78    | 5.25     | 18       | 0.48    | 2.13 | 37.26  | 3.43   |       |      |
| AT17                             | 184.41    | 48.53    | 4.27     | 12.9     | 0.43    | 3.80 | 30.23  | 3.02   |       |      |

|        |        |         |       |      |      |      |       |      |
|--------|--------|---------|-------|------|------|------|-------|------|
| AT19   | 191.05 | 52.97   | 1.99  | 16.7 | 0.23 | 3.61 | 71.34 | 8.39 |
| AT21   | 53.9   | 296.25  | 10.74 | 26.2 | 1.78 | 0.18 | 14.76 | 2.44 |
| AT43   | 199.96 | 679.35  | 19.13 | 27.1 | 2.17 | 0.29 | 12.51 | 1.42 |
| AT48   | 309.85 | 510.9   | 13.22 | 16.5 | 1.08 | 0.61 | 15.22 | 1.25 |
| AT37   | 34.07  | 189.48  | 4.9   | 20   | 0.52 | 0.18 | 38.8  | 4.08 |
| AT45-S | 42.75  | 112.66  | 10.99 | 12.5 | 0.44 | 0.38 | 28.68 | 1.14 |
| AT46   | 114.24 | 180.62  | 8.39  | 7.4  | 0.73 | 0.63 | 10.19 | 0.88 |
| AT47   | 328    | 705     | 14.2  | 7.9  | 1.36 | 0.47 | 5.8   | 0.56 |
| AT27   | 135.58 | 821.37  | 10.59 | 11.7 | 1.48 | 0.17 | 7.93  | 1.10 |
| AT28   | 237.82 | 1455.66 | 12.29 | 6.9  | 2.94 | 0.16 | 2.34  | 0.56 |

| <b>Samples</b> | <b>CaO'</b> | <b>CaO*</b> | <b>CIA</b> | <b>CIA Corr</b> |
|----------------|-------------|-------------|------------|-----------------|
| AT2            | 39.98       | 1.17        | 56.92      | 47.87           |
| AT3-C          | 38.53       | 0.91        | 60.35      | 54.99           |
| AT4            | 41.07       | 0.90        | 60.01      | 53.55           |
| AT5-V          | 52.12       | 0.10        | 48.70      | 34.22           |
| AT5-M          | 38.49       | 1.13        | 56.13      | 47.72           |
| AT6            | 42.84       | 0.95        | 59.55      | 49.84           |
| AT7            | 32.80       | 1.85        | 57.55      | 46.42           |
| AT8            | 38.55       | 0.76        | 59.55      | 51.47           |
| AT12-S         | 48.00       | 0.16        | 59.30      | 53.72           |
| AT12-R         | 3.74        | 1.86        | 61.07      | 58.23           |
| AT35           | 46.55       | 0.89        | 48.50      | 34.99           |
| AT15-b         | 35.09       | 1.63        | 58.01      | 46.84           |
| AT17           | 33.15       | 2.02        | 51.85      | 39.83           |
| AT19           | 40.21       | 0.84        | 51.96      | 40.77           |
| AT21           | 0.72        | 0.72        | 64.94      | 66.42           |
| AT43           | 0.10        | 0.10        | 66.04      | 63.89           |
| AT48           | 0.28        | 0.28        | 63.75      | 54.09           |
| AT37           | 0.33        | 0.33        | 67.10      | 63.34           |
| AT45-S         | 2.24        | 2.24        | 58.63      | 45.89           |
| AT46           | 24.80       | 2.30        | 53.70      | 42.86           |
| AT47           | 6.57        | 5.72        | 50.55      | 38.94           |
| AT27           | 0.11        | 0.11        | 65.15      | 60.68           |
| AT28           | 0.18        | 0.18        | 62.63      | 61.20           |
| Aver. Of Ca    | 40.57       | 1.02        | 56.03      | 47,17           |
| Aver. Of Ep    | 3.91        | 1.39        | 61.35      | 55,25           |

206  
207

Supplementary Table 8 Pearson's correlation coefficient (*r*) between redox sensitive elements and Al for carbonate samples. Values in bold are different from 0 at significance level  $\alpha=0.05$

| Variables | Co           | Cr           | Cu           | Ni           | Th           | U            | V            | Zn       | Al2O3    |
|-----------|--------------|--------------|--------------|--------------|--------------|--------------|--------------|----------|----------|
| Co        | <b>1</b>     |              |              |              |              |              |              |          |          |
| Cr        | <b>0.742</b> | <b>1</b>     |              |              |              |              |              |          |          |
| Cu        | 0.059        | 0.355        | <b>1</b>     |              |              |              |              |          |          |
| Ni        | <b>0.927</b> | <b>0.785</b> | 0.133        | <b>1</b>     |              |              |              |          |          |
| Th        | <b>0.749</b> | <b>0.683</b> | 0.207        | <b>0.880</b> | <b>1</b>     |              |              |          |          |
| U         | <b>0.694</b> | <b>0.701</b> | 0.271        | <b>0.847</b> | <b>0.891</b> | <b>1</b>     |              |          |          |
| V         | <b>0.748</b> | <b>0.729</b> | 0.151        | <b>0.841</b> | <b>0.864</b> | <b>0.835</b> | <b>1</b>     |          |          |
| Zn        | 0.452        | <b>0.772</b> | <b>0.704</b> | 0.345        | 0.135        | 0.197        | 0.261        | <b>1</b> |          |
| Al2O3     | <b>0.855</b> | <b>0.745</b> | 0.174        | <b>0.904</b> | <b>0.953</b> | <b>0.840</b> | <b>0.914</b> | 0.266    | <b>1</b> |

208

209  
210

Supplementary Table 9 Pearson's correlation coefficient (*r*) between redox sensitive trace elements and Al for epiclastic samples. Values in bold are different from 0 at significance level  $\alpha=0.05$

| Variables | Co           | Cr       | Cu       | Ni           | Th           | U        | V            | Zn       | Al2O3    |
|-----------|--------------|----------|----------|--------------|--------------|----------|--------------|----------|----------|
| Co        | <b>1</b>     |          |          |              |              |          |              |          |          |
| Cr        | 0.337        | <b>1</b> |          |              |              |          |              |          |          |
| Cu        | 0.139        | 0.058    | <b>1</b> |              |              |          |              |          |          |
| Ni        | 0.632        | 0.431    | 0.576    | <b>1</b>     |              |          |              |          |          |
| Th        | <b>0.787</b> | 0.582    | 0.084    | 0.690        | <b>1</b>     |          |              |          |          |
| U         | 0.056        | 0.286    | 0.011    | 0.047        | 0.107        | <b>1</b> |              |          |          |
| V         | 0.686        | 0.124    | 0.135    | 0.564        | <b>0.815</b> | 0.420    | <b>1</b>     |          |          |
| Zn        | 0.504        | 0.448    | 0.469    | <b>0.860</b> | <b>0.754</b> | 0.156    | 0.585        | <b>1</b> |          |
| Al2O3     | <b>0.690</b> | 0.596    | 0.025    | 0.533        | <b>0.937</b> | 0.280    | <b>0.725</b> | 0.550    | <b>1</b> |

211

|     |                                                                                                                                             |    |
|-----|---------------------------------------------------------------------------------------------------------------------------------------------|----|
| 212 | <b>Supplementary captions</b>                                                                                                               |    |
| 213 | Supplementary Figure 1 Plots of major elements vs Al <sub>2</sub> O <sub>3</sub> %.....                                                     | 6  |
| 214 | Supplementary Figure 2 a Thin section photomicrograph of a stromatolite composed of the                                                     |    |
| 215 | alternation of iron crust and grain-sized laminae. b Raman spectra of the marked red point in                                               |    |
| 216 | (a). c Thin section photomicrograph of a stromatolite composed of iron laminae, sparitic                                                    |    |
| 217 | crusts and grain-sized microbial laminae. d Raman spectra of the marked red point in (c). ....                                              | 6  |
| 218 | Supplementary Figure 3 Th/Sc versus La/Sc diagram demonstrating a mafic provenance of                                                       |    |
| 219 | Amane Tazgart samples. Note: Andesite, basalt and granite values are from Condie <sup>27</sup> .....                                        | 7  |
| 220 | Supplementary Figure 4 a Al versus Eu/Eu* showing no correlation. b Y/Ho versus Eu/Eu*.                                                     | 7  |
| 221 | Supplementary Figure 5 Pr/Yb <sub>PAAS</sub> diagram discriminating between samples enriched with                                           |    |
| 222 | LREE (Pr/Yb <sub>PAAS</sub> >1) and those enriched with HREE (Pr/Yb <sub>PAAS</sub> <1).....                                                | 7  |
| 223 | Supplementary Figure 6 PAAS normalized REE+Y spectra of the averages of carbonates and                                                      |    |
| 224 | epiclastic samples, compared with REE+Y spectra of Josefsdal chert. ....                                                                    | 8  |
| 225 | Supplementary Figure 7 Figure IV. 9 (a) Plots of Ce/Ce* versus Eu/Eu* (Shields and Stille <sup>28</sup> )                                   |    |
| 226 | .....                                                                                                                                       | 8  |
| 227 | Supplementary Figure 8 Biplots of Fe <sub>2</sub> O <sub>3</sub> % and P <sub>2</sub> O <sub>5</sub> % showing no correlation for carbonate |    |
| 228 | samples and a positive correlation for epiclastic samples.....                                                                              | 8  |
| 229 | Supplementary Figure 9 a Simplified geological map of the Anti-atlas of Morocco. b                                                          |    |
| 230 | Structural Map of Oued Dar'a caldera showing the localization of the studied area (modified                                                 |    |
| 231 | from Chraiki et al., <sup>18</sup> ). ....                                                                                                  | 9  |
| 232 | Supplementary Table 1 Major element data .....                                                                                              | 10 |
| 233 | Supplementary Table 2 Trace elements Data.....                                                                                              | 12 |
| 234 | Supplementary Table 3 Data of Cerium anomalies (Ce/Ce* and Ce/Ce* Eq 2) calculated                                                          |    |
| 235 | using the equation of Bau and Dulski <sup>21</sup> and Lawrence et al., <sup>29</sup> , respectively, Praseodymium                          |    |
| 236 | anomalies (Pr/Pr*) calculated using the equation of Bau and Dulski <sup>21</sup> , Europium anomalies                                       |    |
| 237 | (Eu/Eu*), Y/Ho and Pr/Yb ratios. Note : REY data were normalized to Post Archean Average                                                    |    |
| 238 | Shale (PAAS). ....                                                                                                                          | 15 |
| 239 | Supplementary Table 4 Rare Earth Elements and Yttrium data. Post-Archean average                                                            |    |
| 240 | Australian Shale (PAAS: Taylor and McLennan <sup>20</sup> ) .....                                                                           | 16 |
| 241 | Supplementary Table 5 Enrichment factors of Arsenic and redox sensitive trace elements,                                                     |    |
| 242 | and Cu/Zn ratios. ....                                                                                                                      | 17 |
| 243 | Supplementary Table 6 Data of the different salinity proxies (wei and Algeo <sup>30</sup> ), compared                                       |    |
| 244 | with data of the Triassic Zhangjiatan (from li et al., <sup>31</sup> ). ....                                                                | 18 |
| 245 | Supplementary Table 7 Data of the chemical index of alteration calculated from the equation                                                 |    |
| 246 | of Fedo et al., <sup>25</sup> , and corrected from the equation of Panahi et al <sup>26</sup> .....                                         | 20 |
| 247 | Supplementary Table 8 Pearson's correlation coefficient (r) between redox sensitive elements                                                |    |
| 248 | and Al for carbonate samples. Values in bold are different from 0 at significance level                                                     |    |
| 249 | alpha=0.05 .....                                                                                                                            | 21 |
| 250 | Supplementary Table 9 Pearson's correlation coefficient (r) between redox sensitive trace                                                   |    |
| 251 | elements and Al for epiclastic samples. Values in bold are different from 0 at significance                                                 |    |
| 252 | level alpha=0.05 .....                                                                                                                      | 21 |
| 253 |                                                                                                                                             |    |

255 **Supplementary references**

- 256 1. McLennan SM. Relationships between the trace element composition of sedimentary  
257 rocks and upper continental crust. *Geochemistry, Geophys Geosystems*. 2001;2(4).  
258 doi:10.1029/2000GC000109@10.1002/(ISSN)1525-2027.GERM1
- 259 2. Choubert G. Histoire géologique du domaine de l'Anti-Atlas. *Notes Mémoires du Serv*  
260 *Géologique du Maroc 100*. 1952:196.
- 261 3. Soullaimani A, Burkhard M. The Anti-Atlas chain (Morocco): The southern margin of  
262 the Variscan belt along the edge of the West African craton. *Geol Soc Spec Publ*.  
263 2008;297:433-452. doi:10.1144/SP297.20
- 264 4. Choubert G. Histoire géologique du Précambrien de l'Anti-Atlas. *Notes Mem Serv*  
265 *Geol Maroc*. 1963:162-352.
- 266 5. Hefferan K, Soullaimani A, Samson SD, et al. A reconsideration of Pan African  
267 orogenic cycle in the Anti-Atlas Mountains, Morocco. *J African Earth Sci*. 2014;98:34-  
268 46. doi:10.1016/J.JAFREARSCI.2014.03.007
- 269 6. Gasquet D, Levresse G, Cheilletz A, Azizi-Samir MR, Mouttaqi A. Contribution to a  
270 geodynamic reconstruction of the Anti-Atlas (Morocco) during Pan-African times with  
271 the emphasis on inversion tectonics and metallogenic activity at the Precambrian–  
272 Cambrian transition. *Precambrian Res*. 2005;140(3-4):157-182.  
273 doi:10.1016/J.PRECAMRES.2005.06.009
- 274 7. Thomas RJ, Fekkak A, Ennih N, Errami E, Loughlin SC. A new lithostratigraphic  
275 framework for the Anti-Atlas Orogen , Morocco. 2004;39:217-226.  
276 doi:10.1016/j.jafrearsci.2004.07.046
- 277 8. Thomas RJ, Chevallier LP, Gresse PG, et al. Precambrian evolution of the Sirwa  
278 Window, Anti-Atlas Orogen, Morocco. *Precambrian Res*. 2002;118(1-2):1-57.  
279 doi:10.1016/S0301-9268(02)00075-X
- 280 9. Walsh GJ, Benziane F, Aleinikoff JN, et al. Neoproterozoic tectonic evolution of the  
281 Jebel Saghro and Bou Azzer—El Graara inliers, eastern and central Anti-Atlas,  
282 Morocco. *Precambrian Res*. 2012;216-219:23-62.  
283 doi:10.1016/J.PRECAMRES.2012.06.010

- 284 10. Hawkins, M.P., Beddoe-Stephens, B., Gillespie MR, Loughlin S, et al. Carte  
285 géologique du Maroc au 1/50 000, feuille Tiwit. *Notes Mémoires du Serv Géologique*  
286 *du Maroc*. 2001;404.
- 287 11. Hindermeier J, Gauthier H, Destombes J, Choubert G. Carte géologique du Maroc,  
288 Jbel Saghro-Dades (Haut Atlas central, sillon sud-atlasique et Anti-Atlas oriental)—  
289 Echelle 1/200,000. *Notes Mém Serv Geol Maroc*. 1977.
- 290 12. Algeo TJ, Maynard JB. Trace-element behavior and redox facies in core shales of  
291 Upper Pennsylvanian Kansas-type cyclothems. *Chem Geol*. 2004;206(3-4):289-318.  
292 doi:10.1016/J.CHEMGEO.2003.12.009
- 293 13. Tuduri J, Chauvet A, Barbanson L, et al. The jbel saghro au(–ag, cu) and ag–hg  
294 metallogenetic province: product of a long-lived ediacaran tectono-magmatic evolution  
295 in the moroccan anti-atlas. *Minerals*. 2018;8(12). doi:10.3390/min8120592
- 296 14. Walsh GJ, Aleinikoff JN, Benziane F, Yazidi A, Armstrong TR. U–Pb zircon  
297 geochronology of the Paleoproterozoic Tagragra de Tata inlier and its Neoproterozoic  
298 cover, western Anti-Atlas, Morocco. *Precambrian Res*. 2002;117(1-2):1-20.  
299 doi:10.1016/S0301-9268(02)00044-X
- 300 15. Álvaro JJ, Ezzouhairi H, Ait Ayad N, Charif A, Solá R, Ribeiro ML. Alkaline lake  
301 systems with stromatolitic shorelines in the Ediacaran volcanosedimentary Ouarzazate  
302 Supergroup, Anti-Atlas, Morocco. *Precambrian Res*. 2010;179(1-4):22-36.  
303 doi:10.1016/j.precamres.2010.02.009
- 304 16. Choubert, G., Faure-Muret A. Les corrélations du Précambrien, Anti-Atlas occidental  
305 et central. Colloque international sur les corrélations du Précambrien: Agadir – Rabat,  
306 3–23 mai 1970. Livret guide de l’excursion: Anti-Atlas occidental et central. *Notes*  
307 *Mémoires du Serv Géologique du Maroc* 229. 1970:259.
- 308 17. Harrison RW, Yazidi A, Benziane F, et al. Carte géologique au 1/50 000, Feuille  
309 Tizgui. *Notes Mémoires du Serv Géologique du Maroc*. 2008;470:131.
- 310 18. Chraiki I, Bouougri EH, Chi Fru E, et al. A 571 million-year-old alkaline volcanic lake  
311 photosynthesizing microbial community, the Anti-atlas, Morocco. *Geobiology*. 2020.  
312 doi:10.1111/GBI.12425
- 313 19. Álvaro JJ, González-Acebrón L. Sublacustrine hydrothermal seeps and silicification of



- 314 microbial bioherms in the Ediacaran Oued Dar'a caldera, Anti-Atlas, Morocco.  
315 *Sedimentology*. 2019;66(6):2048-2071. doi:10.1111/sed.12568
- 316 20. Taylor, S R; & McLennan SM. *The Continental Crust: Its Composition and Evolution*.  
317 *United States*. united states; 1985. <https://www.osti.gov/biblio/6582885>.
- 318 21. Bau M, Dulski P. Distribution of yttrium and rare-earth elements in the Penge and  
319 Kuruman iron-formations, Transvaal Supergroup, South Africa. *Precambrian Res*.  
320 1996;79(1-2):37-55. doi:10.1016/0301-9268(95)00087-9
- 321 22. Lawrence MG, Greig A, Collerson KD, Kamber BS. Rare earth element and yttrium  
322 variability in South East Queensland waterways. *Aquat Geochemistry*. 2006;12(1):39-  
323 72. doi:10.1007/s10498-005-4471-8
- 324 23. Tribovillard N, Algeo TJ, Lyons T, Riboulleau A. Trace metals as paleoredox and  
325 paleoproductivity proxies: An update. *Chem Geol*. 2006;232(1-2):12-32.  
326 doi:10.1016/j.chemgeo.2006.02.012
- 327 24. Algeo TJ, Tribovillard N. Environmental analysis of paleoceanographic systems based  
328 on molybdenum-uranium covariation. *Chem Geol*. 2009;268(3-4):211-225.  
329 doi:10.1016/j.chemgeo.2009.09.001
- 330 25. Fedo CM, Nesbitt HW, Young GM. Unraveling the Effects of Potassium  
331 Metasomatism in Sedimentary-Rocks and Paleosols , with Implications for  
332 Paleoweathering Conditions and Provenance Unraveling the effects of potassium  
333 metasomatism in sedimentary rocks and paleosols , with implications f. *Geology*.  
334 1995;23(october):921-924. doi:10.1130/0091-7613(1995)023<0921
- 335 26. Panahi A, Young GM, Rainbird RH. Behavior of major and trace elements (including  
336 REE) during Paleoproterozoic pedogenesis and diagenetic alteration of an Archean  
337 granite near Ville Marie, Québec, Canada. *Geochim Cosmochim Acta*.  
338 2000;64(13):2199-2220. doi:10.1016/S0016-7037(99)00420-2
- 339 27. Kent C. Condie. Chemical composition and evolution of the upper continental crust:  
340 Contrasting results from surface samples and shales. *Chem Geol*. 1993;104:1-37.
- 341 28. Ward JF, Verdel C, Campbell MJ, Leonard N, Duc Nguyen A. Rare earth element  
342 geochemistry of Australian Neoproterozoic carbonate: Constraints on the  
343 Neoproterozoic oxygenation events. *Precambrian Res*. 2019;335:105471.

- 344 doi:10.1016/j.precamres.2019.105471
- 345 29. Shields G, Stille P. Diagenetic constraints on the use of cerium anomalies as  
346 palaeoseawater redox proxies: An isotopic and REE study of Cambrian phosphorites.  
347 *Chem Geol.* 2001;175(1-2):29-48. doi:10.1016/S0009-2541(00)00362-4
- 348 30. Lawrence MG, Kamber BS. The behaviour of the rare earth elements during estuarine  
349 mixing-revisited. *Mar Chem.* 2006;100(1-2):147-161.  
350 doi:10.1016/j.marchem.2005.11.007
- 351 31. Wei W, Algeo TJ. Elemental proxies for paleosalinity analysis of ancient shales and  
352 mudrocks. *Geochim Cosmochim Acta.* 2020;287:341-366.  
353 doi:10.1016/j.gca.2019.06.034
- 354 32. Li D, Li R, Zhu Z, et al. Elemental characteristics and paleoenvironment  
355 reconstruction: a case study of the Triassic lacustrine Zhangjiatan oil shale, southern  
356 Ordos Basin, China. *Acta Geochim.* 2018;37(1):134-150. doi:10.1007/s11631-017-  
357 0193-z
- 358
